# Supplementary material for: In situ back-side illumination fluorescence XAFS (BI-FXAFS) studies on platinum nanoparticles deposited on a HOPG surface as a model fuel cell: a new approach to the Pt-HOPG electrode/electrolyte interface
Source: Royal Society of Chemistry journal article supplement (doi:10.1039/c4cp00265b), 2014-01-01
Supplement: c4cp00265b1.pdf [file c4cp00265b1.pdf]

## Electronic Supplementary Information

### ***In Situ* back-side illumination fluorescence XAFS (BI-FXAFS) studies on platinum nanoparticles deposited on a HOPG surface as a model fuel cell: A new approach to the Pt-HOPG electrode/electrolyte interface**

Hiromitsu Uehara,<sup>a</sup> Yohei Uemura,<sup>a</sup> Takafumi Ogawa,<sup>a</sup> Kentaro Kono,<sup>a</sup> Ryoichi Ueno,<sup>a</sup> Yasuhiro Niwa,<sup>b</sup> Hiroaki Nitani,<sup>b</sup> Hitoshi Abe,<sup>b</sup> Satoru Takakusagi,<sup>a</sup> Masaharu Nomura<sup>b</sup>, Yasuhiro Iwasawa<sup>c</sup> and Kiyotaka Asakura<sup>\*a</sup>

<sup>a</sup> Catalysis Research Center, Hokkaido University, Sapporo, Hokkaido 001-0021, Japan.

<sup>b</sup> Photon Factory, Institute of Materials Structure Science, High-Energy Accelerator Research Organization, Tsukuba, Ibaraki 305-0801, Japan.

<sup>c</sup> Department of Engineering Science, the University of Electro-Communications. Chofu, Tokyo 182-8585, Japan.

#### Contents:

|                                                   |        |
|---------------------------------------------------|--------|
| 1. Estimation of number of Pt atoms on HOPG       | page 2 |
| 2. Curve fitting result of as-syn. PtNPs          | page 3 |
| 3. Preparation and morphology of conc. PtNPs/HOPG | page 4 |
| 4. Throughput of BCLA                             | page 5 |
| 5. F test of Fig. 8                               | Page 6 |

## 1. Estimation of number of Pt atoms on HOPG

TEM shows that the Pt nanocluster has a diameter of  $1.6 \pm 0.6$  nm. EXAFS coordination number suggests the presence of Pt<sub>55</sub> with 1.4 nm in diameter (shown below). If the Pt<sub>55</sub> cluster is present, the ratio of surface to total atoms was 42/55. The surface atoms can be estimated from the cathodic charge between 0.35 to 0.07 V of stable CVs area ( $10.75 \times 10^{-6}$  C) so that the total Pt loading was  $0.9 \times 10^{14}$  cm<sup>-2</sup>.

$$\frac{10.75 \times 10^{-6} [\text{C}]}{96485 [\text{C/mol}]} \times \frac{55}{42} \times 6.02 \times 10^{23} = 0.9 \times 10^{14}$$

Independently we calculated the Pt loading from the density of clusters that was estimated from the AFM pictures as  $(3 \pm 2) \times 10^{-2}$  nm<sup>-2</sup>. If Pt<sub>55</sub> was present, it provided  $(1.7 \pm 1.1) \times 10^{14}$  cm<sup>-2</sup>. Thus we estimated the Pt loading as  $1 \times 10^{14}$  cm<sup>-2</sup>.

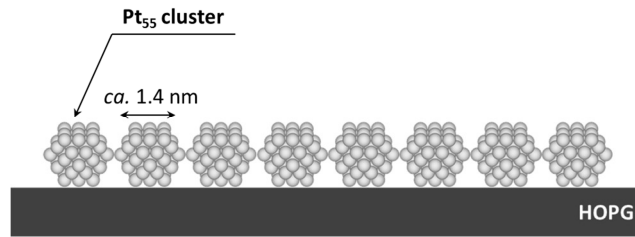

**Fig. S1** Schematic illustration of PtNPs on HOPG.

## 2. Curve fitting result of as-syn. PtNPs

Fourier transform shows the two peaks. The first peak and second peak correspond to Pt-S and Pt-Pt, respectively. The second peak was Fourier filtered in the range of 0.22-0.32 nm and one shell curve fitting analysis provided the Pt-Pt distance at 0.274 nm.

We further carried out two shell fit for the inverse Fourier transformed data in the range of 0.13-0.33 nm with Pt-Pt and Pt-S. We obtained the results as shown in Table S1. The fitting results were well corresponding to the model of Pt<sub>55</sub> fully covered with thiols. Pt<sub>55</sub> cuboctahedral structure should have 1.4 nm in diameter with 7.8 in coordination number.

**Table S1** Curve fitting results on as-syn. PtNPs.

| scattering<br>atom | coordination<br>number | bond length /<br>nm | DW / nm           | Phase shift and<br>amplitude references |
|--------------------|------------------------|---------------------|-------------------|-----------------------------------------|
| Pt-Pt              | $7.5 \pm 0.8$          | $0.274 \pm 0.003$   | $0.01 \pm 0.001$  | Pt foil                                 |
| Pt-S               | $1.0 \pm 0.3$          | $0.225 \pm 0.003$   | $0.005 \pm 0.001$ | FEFF                                    |

K range: 30-130 nm<sup>-1</sup>; Fourier Filtering: 0.13-0.33 nm; R-factor: 1.23%

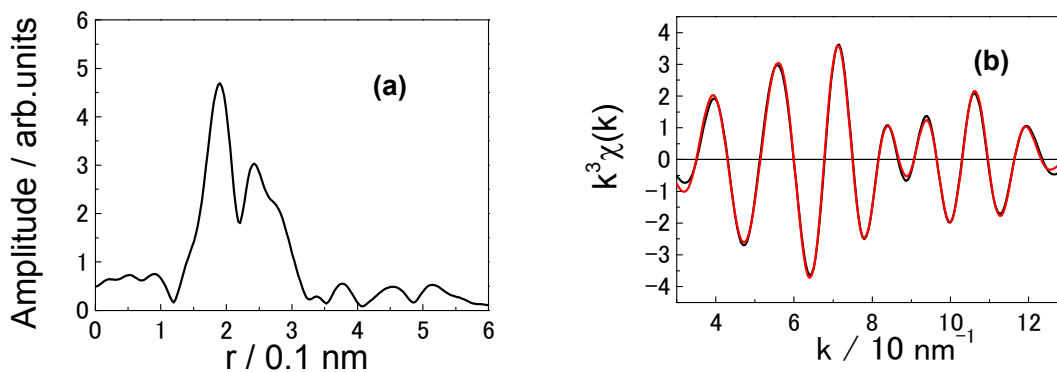

**Fig. S2** Fourier transform (a) and its best fitting results of inverse Fourier transform (b) of as syn. PtNPs. Red and black curves are calculated and observed  $k^3\chi(k)$ , respectively.

### 3. Preparation and morphology of conc. PtNPs/HOPG

The HOPG substrate was dipped in the PtNPs dispersed solution and then dried to obtain a sample with higher concentration. According to the AFM image, PtNPs were deposited as multilayers but one can still see the step and terrace structure of HOPG.

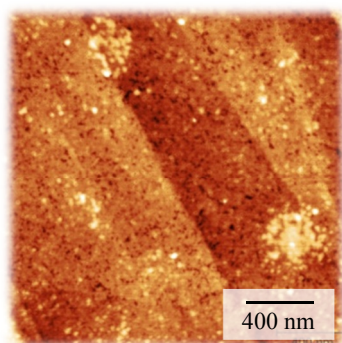

**Fig. S3** An AFM image of higher concentrated PtNPs on HOPG (conc. PtNPs/HOPG).

#### 4. Throughput of BCLA

We briefly tested the throughput of the BCLA using a pixel-array detector and dilute  $\text{PtO}_2$  as a test sample. Fig. S4 shows images obtained before and after the absorption edge. Before the absorption edge, the image was dark because there was no fluorescence, while some part of the pixels appeared brighter after the edge, as shown in Fig. S4c. The partial change of contrast before and after the absorption edge might be caused by the poor alignment of the BCLA crystal.

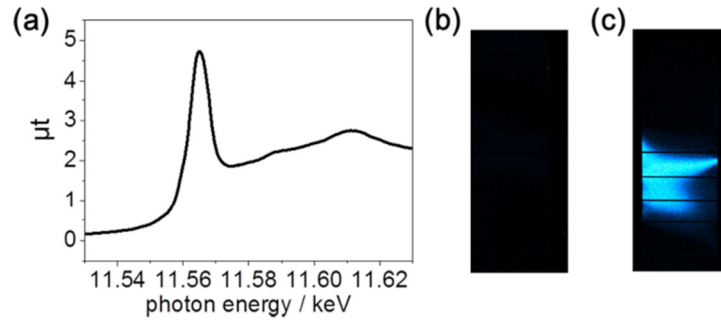

**Fig. S4** (a) Fluorescent XANES spectrum of 0.1 mg  $\text{PtO}_2$  diluted in 100 mg boron nitride obtained by a pixel-array detector (PILATUS 100K) with a BCLA. (b) Pixel-array detector image exposed at  $E = 11540$  eV. Dwell time = 3 s. (c) Pixel-array detector image exposed at  $E = 11565$  eV. Dwell time = 3 s. The beam size was  $0.5 \times 1 \text{ mm}^2$ .

## 5. F-test of Fig. 8

The difference of XANES spectra in hydrogen adsorption/desorption reaction is very small both experimentally and theoretically. (Difference in normalized XANES spectra is less than 0.1). In order to claim the point definitely, we have applied F-test.

XANES spectra shown in Fig. 8a were averaged data of 29 spectra. Thus one can estimate regression sum of squares (SSR) (error in the average values) and error sum of squares (SSE) (data uncertainty in each file) as follows,

$$\begin{aligned} \text{SSR} &= n_1(\mu_1 - \mu)^2 + n_2(\mu_2 - \mu)^2 \\ \text{SSE} &= \sum_{i=1}^{n_1} (y_i - \mu_1)^2 + \sum_{i=n_1+1}^n (y_i - \mu_2)^2 \end{aligned}$$

where  $n_x$  is a number of experiment ( $n_1 = n_2 = 29$ ,  $n = n_1 + n_2 = 58$ ),  $\mu$  is average of all experiment,  $\mu_x$  is the average of  $x$  each experimental group,  $y_i$  is data point of  $i^{\text{th}}$  experiment,  $k$  is number of experimental group ( $k = 2$ ).

The null hypothesis is “there is no difference between two spectra” or “SSE and SSR are equal”. Thus the F is defined as

$$F_{\nu_1, \nu} = \frac{\text{SSR}/\nu_1}{\text{SSE}/\nu}$$

where  $\nu$  and  $\nu_1$  are numbers of freedom ( $\nu = n - k = 56$ ,  $\nu_1 = k - 1 = 1$ ).

We can safely to say that the peaks in the difference spectrum around 11558 eV were meaningful with the confidence level more than 0.8 as shown in Fig.S5

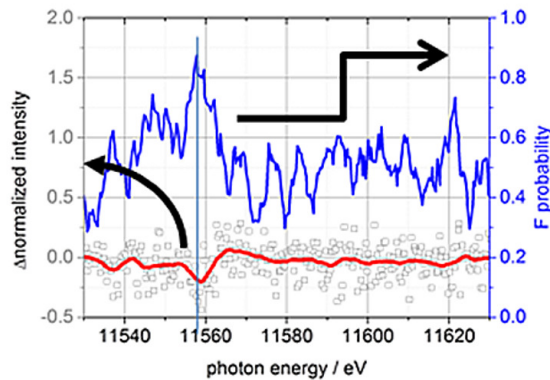

**Fig. S5** Difference spectra (lower red line) and F values (upper blue line).
